# Supplementary material for: Homogeneity assessment of Swiss snow depth series: comparison of break detection capabilities of (semi-)automatic homogenization methods
Source: Copernicus journal article supplement (doi:10.5194/tc-16-2147-2022), 2022-06-09
Supplement: Supplementary file 1 [file tc-16-2147-2022-supplement.pdf]

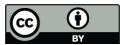

*Supplement of*

## **Homogeneity assessment of Swiss snow depth series: comparison of break detection capabilities of (semi-)automatic homogenization methods**

**Moritz Buchmann et al.**

*Correspondence to:* Moritz Buchmann ([moritz.buchmann@slf.ch](mailto:moritz.buchmann@slf.ch))

The copyright of individual parts of the supplement might differ from the article licence.

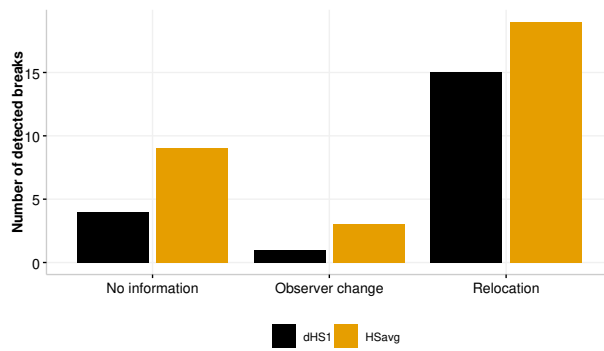

**Figure S 1.** Metadata type associated with valid break points.

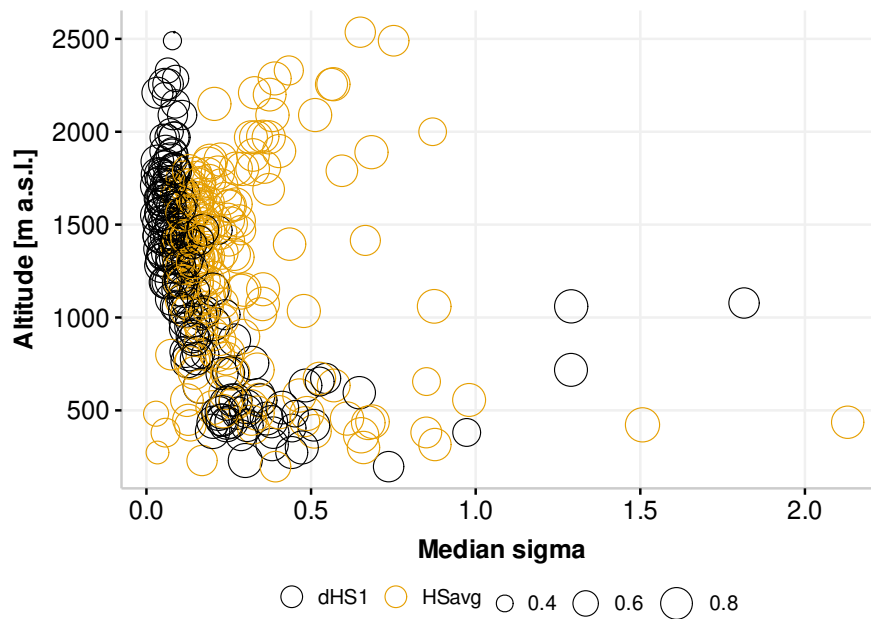

**Figure S 2.** For both variables HSavg and dHS1, the median sigma of the subset of 5 reference series with lowest sigma for each candidate series is plotted against the altitude of the candidate series. The size of the dots corresponds to the median correlation of these subsets. All correlation and sigma values are from HOMER.

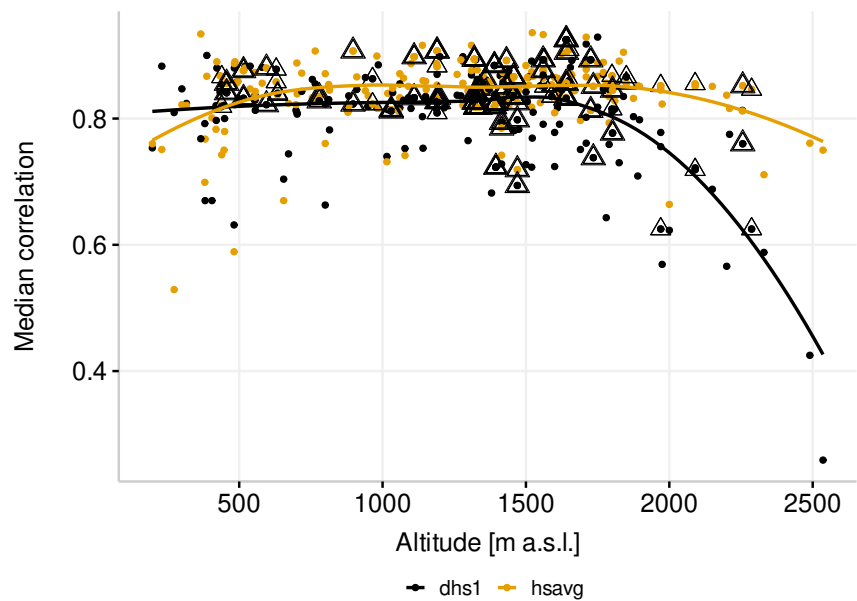

**Figure S 3.** For both variables HSavg and dHS1, the median correlation of the subset of 5 reference series with lowest sigma for each candidate series is plotted against the altitude of the candidate series. The coloured lines are fitted means for both dHS1 (red) and HSavg (green). Valid break points are highlighted with triangles (break identified by HOMER with thick triangles). All correlation and sigma values are from HOMER.

| Name | Altitude [m a.s.l.] | mHSavg [cm] | mdHS1 [days] | Name  | Altitude [m a.s.l.] | mHSavg [cm] | mdHS1 [days] |
|------|---------------------|-------------|--------------|-------|---------------------|-------------|--------------|
| MAG  | 197                 | 1           | 23           | ABO   | 1325                | 26          | 131          |
| 6BE  | 230                 | 1           | 16           | 5CU   | 1330                | 16          | 113          |
| LUG  | 273                 | 1           | 14           | 3UI   | 1340                | 55          | 151          |
| RHF  | 300                 | 1           | 25           | 4UL   | 1345                | 67          | 156          |
| BAS  | 316                 | 1           | 23           | 3SW   | 1350                | 74          | 157          |
| OTL  | 366                 | 1           | 20           | 1LC   | 1360                | 47          | 134          |
| GRO  | 380                 | 2           | 21           | 4OW   | 1370                | 81          | 161          |
| AIG  | 381                 | 1           | 17           | 5BE   | 1380                | 25          | 131          |
| BUS  | 387                 | 1           | 22           | 1SM   | 1390                | 42          | 139          |
| CLA  | 405                 | 0           | 13           | URB   | 1395                | 36          | 142          |
| HLL  | 419                 | 1           | 35           | 4MS   | 1410                | 55          | 148          |
| GVE  | 420                 | 1           | 18           | 7ST   | 1415                | 24          | 132          |
| WYN  | 422                 | 2           | 38           | SMM   | 1415                | 24          | 135          |
| BIL  | 433                 | 1           | 29           | 5OB   | 1420                | 34          | 144          |
| KLO  | 436                 | 1           | 32           | 5SE   | 1420                | 42          | 149          |
| DEM  | 439                 | 1           | 31           | r.sus | 1432                | 28          | 135          |
| SNS  | 439                 | 2           | 39           | SED   | 1432                | 38          | 147          |
| PAV  | 447                 | 0           | 16           | 2AN   | 1440                | 72          | 164          |
| ALT  | 449                 | 1           | 34           | ANT   | 1440                | 68          | 162          |
| LUZ  | 456                 | 2           | 37           | 4WI   | 1450                | 42          | 136          |
| SIO  | 482                 | 2           | 32           | 5SP   | 1457                | 40          | 148          |
| KOP  | 483                 | 1           | 38           | 5IN   | 1460                | 27          | 142          |
| NEU  | 485                 | 1           | 27           | 4SM   | 1470                | 30          | 115          |
| PAY  | 490                 | 1           | 27           | ZNZ   | 1470                | 18          | 124          |
| RAG  | 496                 | 4           | 51           | 7ZN   | 1475                | 22          | 127          |
| GLA  | 515                 | 7           | 65           | 4FY   | 1500                | 68          | 161          |
| 5LQ  | 520                 | 5           | 53           | RIE   | 1500                | 40          | 139          |
| LAN  | 538                 | 5           | 54           | BOS   | 1505                | 63          | 153          |
| BER  | 555                 | 2           | 42           | 5SA   | 1510                | 69          | 162          |
| CHU  | 555                 | 4           | 55           | 1JA   | 1520                | 54          | 146          |
| SMA  | 556                 | 2           | 44           | 1MN   | 1520                | 55          | 151          |
| 1IN  | 580                 | 3           | 54           | r.lar | 1522                | 92          | 167          |
| MER  | 595                 | 6           | 70           | 6BG   | 1525                | 64          | 156          |
| EBK  | 629                 | 8           | 79           | 2GA   | 1550                | 71          | 162          |
| GRA  | 634                 | 1           | 33           | 4GR   | 1560                | 31          | 134          |
| VIS  | 655                 | 3           | 47           | 5DF   | 1560                | 50          | 157          |
| THS  | 672                 | 7           | 71           | x.DAV | 1560                | 51          | 160          |
| ILZ  | 698                 | 11          | 84           | 1GB   | 1565                | 58          | 154          |
| 5TH  | 701                 | 6           | 68           | x.MVE | 1590                | 44          | 134          |
| HAI  | 702                 | 4           | 70           | 4ZE   | 1600                | 39          | 145          |
| MAS  | 718                 | 2           | 52           | ZER   | 1600                | 36          | 147          |
| LAG  | 755                 | 4           | 60           | 3MB   | 1610                | 47          | 155          |
| 3WA  | 765                 | 11          | 90           | 5HI   | 1610                | 64          | 162          |
| STG  | 779                 | 6           | 77           | GRC   | 1617                | 23          | 129          |
| 1LB  | 800                 | 10          | 95           | r.wol | 1625                | 68          | 159          |
| 7BR  | 800                 | 1           | 31           | 2RI   | 1640                | 57          | 155          |
| LTB  | 812                 | 10          | 91           | 6SB   | 1640                | 61          | 158          |

|     |      |    |     |       |      |     |     |
|-----|------|----|-----|-------|------|-----|-----|
| 5KU | 815  | 21 | 119 | MUE   | 1641 | 58  | 160 |
| 5TC | 879  | 9  | 79  | 1MR   | 1650 | 56  | 159 |
| SSE | 882  | 17 | 112 | 5MA   | 1655 | 41  | 149 |
| GSS | 897  | 14 | 101 | 7SC   | 1660 | 39  | 152 |
| EIN | 910  | 18 | 112 | 4BP   | 1670 | 27  | 137 |
| 5PU | 940  | 19 | 101 | 7CA   | 1690 | 57  | 150 |
| 2GU | 950  | 13 | 93  | 7FA   | 1710 | 40  | 151 |
| ELM | 965  | 26 | 124 | 7LD   | 1710 | 53  | 166 |
| 6AM | 980  | 24 | 118 | 7ZU   | 1710 | 36  | 147 |
| CHD | 985  | 13 | 102 | DMA   | 1710 | 48  | 158 |
| 7PV | 1015 | 6  | 70  | x.SAM | 1726 | 38  | 154 |
| CDF | 1018 | 15 | 105 | 5ZV   | 1735 | 67  | 170 |
| FIL | 1030 | 13 | 98  | 7SD   | 1750 | 38  | 151 |
| ENG | 1035 | 21 | 124 | 7SN   | 1750 | 45  | 157 |
| GTT | 1055 | 30 | 124 | 5BI   | 1770 | 52  | 163 |
| 2OG | 1060 | 38 | 141 | BIV   | 1770 | 57  | 167 |
| MAR | 1060 | 2  | 53  | 2TR   | 1780 | 117 | 172 |
| CHM | 1073 | 18 | 109 | r.pre | 1789 | 50  | 160 |
| ROB | 1078 | 9  | 78  | 4SF   | 1790 | 47  | 161 |
| 5VZ | 1090 | 19 | 102 | 6RI   | 1800 | 69  | 158 |
| GOS | 1099 | 39 | 139 | 6RP.a | 1800 | 78  | 164 |
| 2GO | 1110 | 38 | 137 | SIA   | 1802 | 59  | 161 |
| AIR | 1139 | 31 | 126 | 7MA   | 1810 | 76  | 165 |
| PIO | 1141 | 20 | 107 | 1HB   | 1825 | 107 | 168 |
| 2SO | 1150 | 20 | 117 | ARO   | 1840 | 72  | 168 |
| CUE | 1152 | 25 | 117 | 7MZ   | 1850 | 42  | 152 |
| 5KR | 1188 | 43 | 140 | PON   | 1875 | 38  | 152 |
| 1GA | 1190 | 55 | 147 | 6RO   | 1890 | 124 | 167 |
| 3MG | 1190 | 27 | 127 | r.mor | 1896 | 64  | 164 |
| 5KK | 1190 | 60 | 154 | 1GH   | 1970 | 171 | 174 |
| DIS | 1190 | 23 | 124 | 7BU   | 1970 | 58  | 167 |
| 1GS | 1195 | 40 | 147 | BUF   | 1970 | 57  | 163 |
| 5RU | 1200 | 18 | 120 | 4LA   | 1975 | 85  | 163 |
| 6CB | 1215 | 41 | 137 | 4SH   | 2000 | 90  | 170 |
| 5VA | 1260 | 20 | 125 | 7AG   | 2090 | 72  | 157 |
| 5SI | 1273 | 24 | 123 | 7DI   | 2090 | 76  | 168 |
| 1WE | 1280 | 24 | 135 | 7MT   | 2150 | 64  | 165 |
| 2ST | 1280 | 59 | 154 | 4RU   | 2200 | 107 | 165 |
| SCU | 1298 | 21 | 118 | 4KU   | 2210 | 88  | 168 |
| 1LS | 1300 | 27 | 120 | 7BP   | 2255 | 122 | 169 |
| 3BR | 1310 | 66 | 155 | BEH   | 2256 | 126 | 169 |
| 3FB | 1310 | 64 | 156 | GUE   | 2287 | 172 | 163 |
| 1MI | 1320 | 49 | 146 | 7AL   | 2330 | 83  | 174 |
| 2ME | 1320 | 50 | 147 | SAE   | 2490 | 246 | 164 |
| 1AD | 1325 | 21 | 129 | 5WJ   | 2536 | 145 | 178 |

Table S 1: List of all stations used in this study, along with altitude values for mean HSavg and mean dHS1.
